# Supplementary material for: Spatially resolved investigation into the coke formation and chemical states of nickel during autothermal reforming of acetic acid over Ni/CeO2–ZrO2 catalysts
Source: Royal Society of Chemistry journal article supplement (doi:10.1039/d1re00561h), 2022-01-01
Supplement: d1re00561h1.pdf [file d1re00561h1.pdf]

## Supporting Information

### **Spatially resolved investigation into the coke formation and chemical states of nickel during autothermal reforming of acetic acid over Ni/CeO<sub>2</sub>-ZrO<sub>2</sub> catalysts**

Nat Phongprueksathat <sup>a</sup>, Thanakorn Thanasujaree <sup>b</sup>, Vissanu Meeyoo <sup>a, c, \*</sup>, Thirasak Rirksomboon <sup>b</sup>

<sup>a</sup>) Centre for Advanced Materials and Environmental Research,  
Mahanakorn University of Technology, Bangkok 10530, Thailand

<sup>b</sup>) The Petroleum and Petrochemical College, Chulalongkorn University,  
Bangkok 10330, Thailand

<sup>c</sup>) Nanotec–KMUTT Center of Excellence on Hybrid Nanomaterials for Alternative Energy,  
King Mongkut's University of Technology (KMUTT), Thonburi, Bangkok 10140, Thailand

**Keywords:** acetic acid; autothermal reforming; carbon formation; nickel; ceria; zirconia;

---

\*To whom the correspondence should be addressed:

Mahanakorn University of Technology, Bangkok, Thailand 10530

Tel: +66(2)-988-4043; fax: +66(2)-2988-4039

Email address: [vissanu@mut.ac.th](mailto:vissanu@mut.ac.th) (V.Meeyoo)

## Contents

|                                                                         |    |
|-------------------------------------------------------------------------|----|
| <b>1. Experimental</b> .....                                            | 3  |
| 1.1 Catalyst characterizations procedures.....                          | 3  |
| 1.1.1 BET Surface Area.....                                             | 3  |
| 1.1.2 H <sub>2</sub> -Temperature Programmed Reduction.....             | 3  |
| 1.1.3 Temperature Programmed Oxidation (TPO).....                       | 3  |
| 1.1.4 X-ray Diffraction (XRD).....                                      | 3  |
| 1.1.5 X-Ray Fluorescence (XRF).....                                     | 3  |
| 1.1.6 X-ray Photoelectron Spectroscopy (XPS).....                       | 4  |
| 1.1.7 Scanning Electron Microscopy (SEM).....                           | 4  |
| 1.1.8 Transmission Electron Microscopy (TEM).....                       | 4  |
| 1.1.9 Thermogravimetric and Differential Thermal Analysis (TG-DTA)..... | 4  |
| <b>2. Results and discussion</b> .....                                  | 4  |
| 2.1 Characterization of fresh catalyst.....                             | 4  |
| 2.2 Catalytic activity.....                                             | 7  |
| 2.3 Characterization of spent catalysts.....                            | 9  |
| <b>References</b> .....                                                 | 10 |

## 1. Experimental

### 1.1 Catalyst characterizations procedures

#### 1.1.1 BET Surface Area

BET surface area is determined by N<sub>2</sub> adsorption at -196 °C using a Quantachrome Autosorb-1MP. Before the analysis, the samples are outgassed to eliminate volatile adsorbents on the surface at 250 °C for 12 h. The quantity of gas adsorbed onto or desorbed from a solid surface is measured at 5 equilibrium vapor pressure (P/P<sub>0</sub>) values of 0.1115, 0.1615, 0.2115, 0.2615, and 0.3115 by the static volumetric method (Eq. 1). The adsorption data are calculated using Brunauer–Emmett–Teller (BET) method as shown in Eq. 2:

$$\frac{P/P_0}{W\left(1 - P/P_0\right)} = \frac{1}{W_m C} + \frac{C-1}{W_m C} \left(\frac{P}{P_0}\right) \quad (1)$$

where

W = the weight of gas adsorbed at relative pressure P<sub>0</sub> (g)

W<sub>m</sub> = the weight of adsorbate constituting a monolayer of surface coverage (g)

C = a constant that is related to the energy of adsorption in the first adsorbed layer and magnitude of adsorbate interaction and then the surface of the sample will be calculated by

$$\text{The surface area of the sample} = \frac{W_m A_{\text{nitrogen}} (6.02 \times 10^{23})}{Mw_{\text{nitrogen}}} \quad (2)$$

where

A<sub>nitrogen</sub> = the crossed-section area of one molecule nitrogen  
= 0.162 nm<sup>2</sup> at -196 °C

Mw<sub>nitrogen</sub> = the molecular weight of nitrogen (g/mol)

#### 1.1.2 H<sub>2</sub>-Temperature Programmed Reduction

Temperature programmed reduction of hydrogen (H<sub>2</sub>-TPR) is carried out using an SRI model 110 TCD detector. The samples are pretreated in an N<sub>2</sub> atmosphere at 150 °C for 30 min before running the TPR experiment and then cooled down to room temperature with N<sub>2</sub> feeding. A 5 % H<sub>2</sub>/ N<sub>2</sub> gas is used as a reducing gas. The temperature is raised at a constant rate of 10 °C/min from room temperature to 900 °C. The amount of H<sub>2</sub> consumption as a function of temperature is determined from a TCD signal.

#### 1.1.3 Temperature Programmed Oxidation (TPO)

The temperature Programmed Oxidation (TPO) technique is employed to analyze the amount and characteristics of the coke deposited on the spent catalyst. The spent catalyst is performed in a continuous flow of 5 % O<sub>2</sub> in He while the temperature will be linearly increased with a heating rate of 10 °C/min. The CO<sub>2</sub> produced by the oxidation of the coke species is converted to methane using a mechanized filled with 15%Ni/Al<sub>2</sub>O<sub>3</sub> and operated at 415 °C in the presence of H<sub>2</sub>. The evolution of methane is analyzed using an FID detector.

#### 1.1.4 X-ray Diffraction (XRD)

A Rigagu X-ray diffractometer (XRD) system equipped with a RINT 2000 wide-angle goniometer using CuK<sub>α</sub> radiation (1.5406 Å) and a power of 40 kV×30 mA is used for examination of the crystalline structure. The sample is ground to a fine homogeneous powder and held on a thin-walled glass plate against the X-ray beam. The intensity data is collected at 25 °C over a 2θ range of 20° to 80° with a scan speed of 5° (2θ)/min and a scan step of 0.02° (2θ).

#### 1.1.5 X-Ray Fluorescence (XRF)

Ceria-Zirconia support is characterized by XRF-semi quantitative method over X-ray Fluorescence Analyzer (model: Panalytical Axios, PW 4400) to ensure that the support is completely synthesized and close to the desired Ce to Zr molar ratio of 3:1 and detected weight percent (wt%) of Ni metal at the catalyst surface.

#### 1.1.6 X-ray Photoelectron Spectroscopy (XPS)

XPS is used for the determination of the surface composition, chemical state, and oxidation state of the fresh and spent catalysts. The XPS spectra are obtained by using an incident chromatic AlK $\alpha$  X-ray source (1253.6 eV) operated at 14.8 kV and 20 mA for excitation and a hemisphere analyzer (Thermo VG scientific). The high-resolution XPS spectra are the composite average of 10 scans with a passing energy of 50 eV. The pressure in the analysis chamber is in the range of 10<sup>-8</sup> Torr during data collection. The binding energy is adjusted to the C 1s peak at 285 eV. Data analysis and curve deconvolution are accomplished by using the Thermo Advantage Spectra Data Processor software. The from the electron pass energy, the inelastic mean free path (IMFP) for Ni and C approximated from NIST Electron Inelastic-Mean-Free-Path Database are 4.8 and 5.8 Å, respectively. This can be translated to a sampling depth of 1.4-1.8 nm.

#### 1.1.7 Scanning Electron Microscopy (SEM)

SEM imaging is carried out using a Tabletop microscope TM 3000 (Hitachi) operated at 5 kV and 15 mA and used for examination of the sample morphologies. Before scanning, the sample is dried overnight at 110 °C followed by Pt coating (model: E-1010) operated at 12 mA for 150 s.

#### 1.1.8 Transmission Electron Microscopy (TEM)

The morphologies of carbon deposition are observed by transmission electron microscopy (TEM) with a JEOL (JEM-2100) transmission electron microscope operated at 200 kV. The samples are dispersed in absolute ethanol ultrasonically, and the solutions are dropped on copper grids coated with a lacey carbon film.

#### 1.1.9 Thermogravimetric and Differential Thermal Analysis (TG-DTA)

Perkin-Elmer/Pyris Diamond TG-DTA instrument is used to study the thermal decomposition of coke to investigate a type of carbon species deposition. Each spent catalyst is heated to 800 °C with a ramping rate of 10 °C/min in the O<sub>2</sub> atmosphere (20 mL/min flow rate).

## 2. Results and discussion

### 2.1 Characterization of fresh catalyst

The BET surface areas and the XRD mean crystallite size of the catalysts are shown in Table S1 (Supporting information). The Ce/Zr molar ratio of the prepared Ce<sub>0.75</sub>Zr<sub>0.25</sub>O<sub>2</sub> support has met the desired ratio of 3:1 and loading nickel metal are expected ca. 15 wt%. The surface area of Ni/ Ce<sub>0.75</sub>Zr<sub>0.25</sub>O<sub>2</sub> catalyst and Ce<sub>0.75</sub>Zr<sub>0.25</sub>O<sub>2</sub> support are ca. 75 and 96 m<sup>2</sup>/g, respectively. The surface areas of Ni/ Ce<sub>0.75</sub>Zr<sub>0.25</sub>O<sub>2</sub> catalyst are decreased as compared with that of Ce<sub>0.75</sub>Zr<sub>0.25</sub>O<sub>2</sub> support due to a blockage of micropores by NiO particles. <sup>1</sup>

**Table S1** The chemical compositions and BET surface areas of the support and catalyst synthesized

| Catalyst                                                      | Composition <sup>a</sup> (wt%) |       |       |       | Ce/Zr ratio | BET surface area (m <sup>2</sup> /g) | Mean Crystallite Size of Ni <sup>b</sup> (nm) |
|---------------------------------------------------------------|--------------------------------|-------|-------|-------|-------------|--------------------------------------|-----------------------------------------------|
|                                                               | Ce                             | Zr    | Ni    | O     |             |                                      |                                               |
| Ce <sub>0.75</sub> Zr <sub>0.25</sub> O <sub>2</sub>          | 68.94                          | 14.53 | -     | 16.52 | 3.09:1      | 96                                   | n/a                                           |
| 15wt% Ni/Ce <sub>0.75</sub> Zr <sub>0.25</sub> O <sub>2</sub> | 60.87                          | 13.21 | 15.14 | 10.77 | 3.00:1      | 74                                   | 24.2 (111) <sup>c</sup>                       |

<sup>a</sup> XRF technique

<sup>b</sup> Calculated from Scherrer equation

<sup>c</sup> Miller indices

The XRD patterns of Ni/Ce<sub>0.75</sub>Zr<sub>0.25</sub>O<sub>2</sub> and Ce<sub>0.75</sub>Zr<sub>0.25</sub>O<sub>2</sub> support are shown in Fig. 2, showing a typical dominant cubic fluorite structure of CeO<sub>2</sub> assigned to peaks of 28.6, 33.1, 47.4, and 56.4° indicating that a typical solid solution of Ce<sub>0.75</sub>Zr<sub>0.25</sub>O<sub>2</sub> is formed. Besides, some extra peaks of the tetragonal phase of ZrO<sub>2</sub> were observed at 30.11, 50.23, and 59.48° indicating some of ZrO<sub>2</sub> were not incorporated in the CeO<sub>2</sub> lattice to form a solid solution. The presence of NiO is found on Ni/Ce<sub>0.75</sub>Zr<sub>0.25</sub>O<sub>2</sub> catalyst revealing peaks at 37.3, 43.3, 63.0, and 75.5° corresponding to plane indices of (111), (200), (220), and (311), respectively. The crystallite size of the Ni particle in the plane (111) is estimated to be ca. 24.2 nm using Scherrer equation.

The morphologies of Ce<sub>0.75</sub>Zr<sub>0.25</sub>O<sub>2</sub> support and Ni/Ce<sub>0.75</sub>Zr<sub>0.25</sub>O<sub>2</sub> catalyst are observed by Scanning Electron Microscopy (SEM) are presented in Fig. S2. All of which illustrates the aggregation of the primary long thin needle-shaped particles similar to that described by Thammachart *et al.*<sup>2</sup> In the presence of Ni metal, the fine particles of NiO can be observed as the attached on the surface of the long thin needles of the Ce<sub>0.75</sub>Zr<sub>0.25</sub>O<sub>2</sub> support.

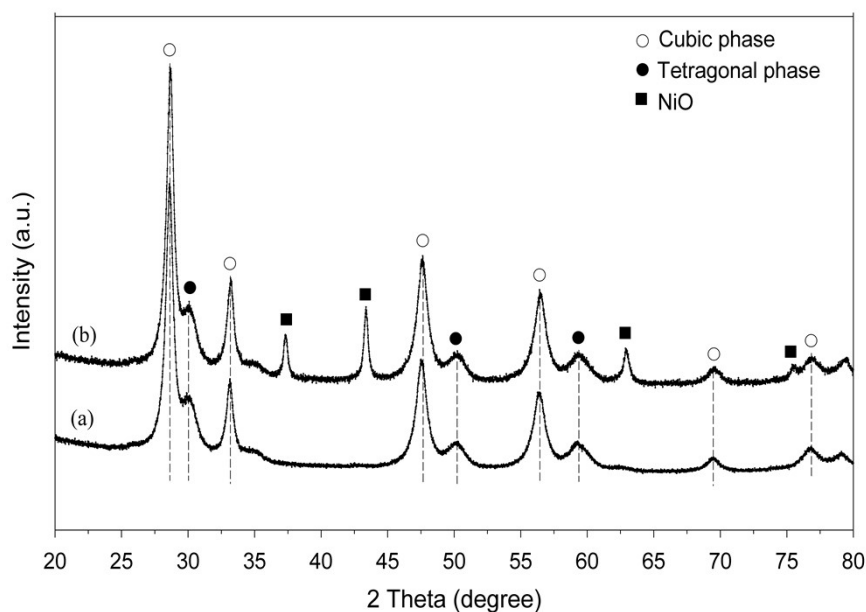

**Figure S1.** XRD patterns of catalysts calcined at 500 °C: (a) Ce<sub>0.75</sub>Zr<sub>0.25</sub>O<sub>2</sub> and (b) 15wt% Ni/Ce<sub>0.75</sub>Zr<sub>0.25</sub>O<sub>2</sub>.

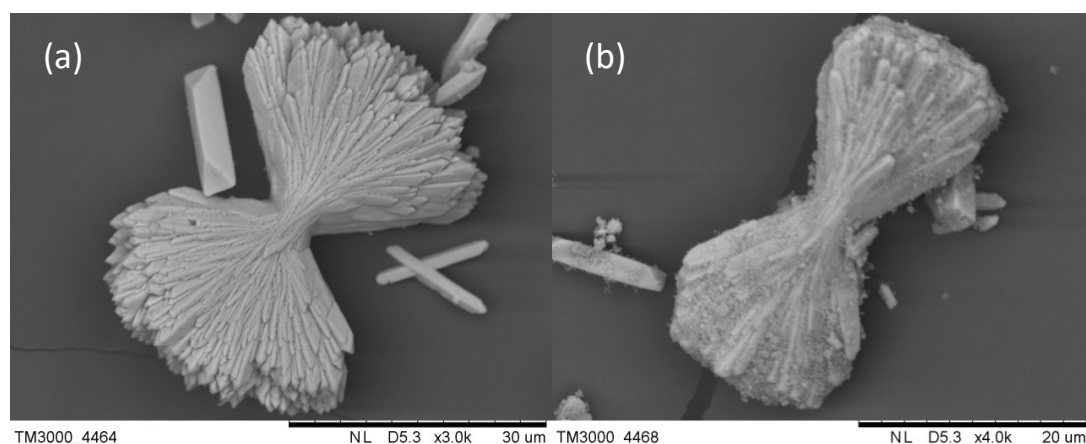

**Figure S2** SEM images of (a) Ce<sub>0.75</sub>Zr<sub>0.25</sub>O<sub>2</sub> and (b) 15wt% Ni/Ce<sub>0.75</sub>Zr<sub>0.25</sub>O<sub>2</sub>.

The H<sub>2</sub>-TPR profiles of Ni/Ce<sub>0.75</sub>Zr<sub>0.25</sub>O<sub>2</sub> catalyst and Ce<sub>0.75</sub>Zr<sub>0.25</sub>O<sub>2</sub> support are shown in Fig. 3. The Ce<sub>0.75</sub>Zr<sub>0.25</sub>O<sub>2</sub> support exhibits two reduction peaks at 410 and 800 °C, which attribute to surface reduction and bulk reduction of CeO<sub>2</sub> from Ce<sup>4+</sup> to Ce<sup>3+</sup>, respectively. The Ni/Ce<sub>0.75</sub>Zr<sub>0.25</sub>O<sub>2</sub> catalyst exhibits two additional peaks from the Ce<sub>0.75</sub>Zr<sub>0.25</sub>O<sub>2</sub> support at 270 and 370 °C, which attribute to the reduction of free NiO particle and reduction of NiO interacting with Ce<sub>0.75</sub>Zr<sub>0.25</sub>O<sub>2</sub> support, respectively<sup>3</sup>. Similar reduction behavior of NiO is observed in the previous work.<sup>4</sup>

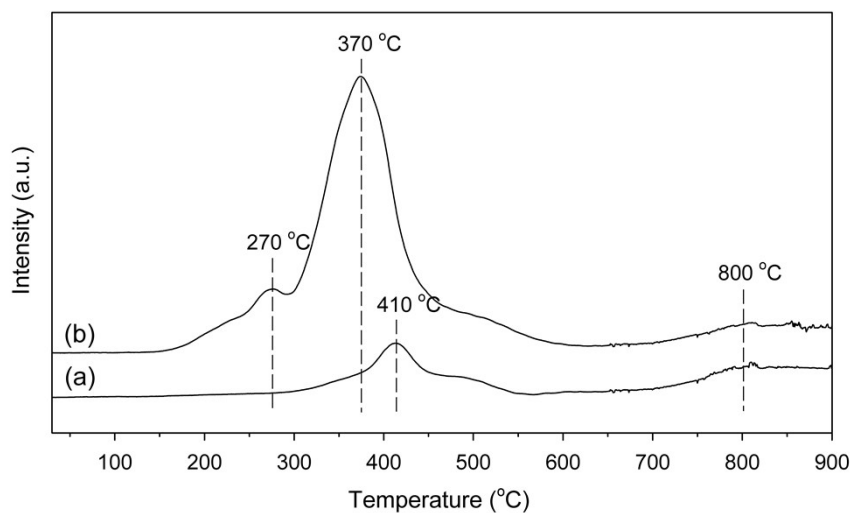

**Figure S3.** H<sub>2</sub>-TPR profiles of catalysts with a heating rate of 10 °C/min, a reducing gas containing 5% H<sub>2</sub> in N<sub>2</sub> with a flow rate of 20 ml/min: (a) Ce<sub>0.75</sub>Zr<sub>0.25</sub>O<sub>2</sub> and (b) Ni/Ce<sub>0.75</sub>Zr<sub>0.25</sub>O<sub>2</sub>.

## 2.2 Catalytic activity

**Table S2** Catalytic activity for SR, POX, and ATR over Ce<sub>0.75</sub>Zr<sub>0.25</sub>O<sub>2</sub> and quartz wool at 650 °C, W/F = 0.352 g·hr/mol (Zone 4).

| Parameters                                  | Ce <sub>0.75</sub> Zr <sub>0.25</sub> O <sub>2</sub> |      |      | Quartz Wool |      |     |
|---------------------------------------------|------------------------------------------------------|------|------|-------------|------|-----|
|                                             | SR                                                   | POX  | ATR  | SR          | POX  | ATR |
| CH <sub>3</sub> COOH conversion (%)         | 65.2                                                 | 11.3 | 67.0 | 1.43        | 1.62 | 1.3 |
| O <sub>2</sub> conversion (%)               | -                                                    | 26.6 | 40.3 | -           | 4.1  | 5.8 |
| H <sub>2</sub> Yield (%)                    | 32.7                                                 | 2.2  | 19.5 | 0.6         | 0.1  | 0.3 |
| CO Yield (%)                                | 4.1                                                  | 0.2  | 3.2  | 0.2         | 0.1  | 0.1 |
| CO <sub>2</sub> Yield (%)                   | 39.3                                                 | 2.9  | 34.3 | 0.7         | 0.4  | 0.7 |
| CH <sub>4</sub> Yield (%)                   | 0.6                                                  | 1.3  | 0.5  | 0.2         | 0.2  | 0.1 |
| CH <sub>3</sub> COCH <sub>3</sub> Yield (%) | 3.0                                                  | 3.1  | 2.9  | 0.7         | 0.6  | 0.6 |

**Table S3** Catalytic activity for SR, POX, and ATR over Ni/Ce<sub>0.75</sub>Zr<sub>0.25</sub>O<sub>2</sub> at 650 °C and W/F of 0.088-0.352 g·hr/mol (Zone 1-4).

| Conditions                                  | SR    |       |       |       | POX   |       |       |       | ATR   |       |       |       |
|---------------------------------------------|-------|-------|-------|-------|-------|-------|-------|-------|-------|-------|-------|-------|
|                                             | 1     | 2     | 3     | 4     | 1     | 2     | 3     | 4     | 1     | 2     | 3     | 4     |
| W/F (g·hr/mol)                              | 0.088 | 0.176 | 0.264 | 0.352 | 0.088 | 0.176 | 0.264 | 0.352 | 0.088 | 0.176 | 0.264 | 0.352 |
| CH <sub>3</sub> COOH conversion (%)         | 78.6  | 95.9  | 100.0 | 100.0 | 19.8  | 24.6  | 29.2  | 30.4  | 66.6  | 93.0  | 100.0 | 100.0 |
| O <sub>2</sub> conversion (%)               | -     | -     | -     | -     | 95.0  | 99.6  | 100.0 | 100.0 | 90.0  | 98.3  | 100.0 | 100.0 |
| H <sub>2</sub> Yield (%)                    | 63.3  | 78.7  | 89.2  | 89.5  | 14.1  | 18.0  | 23.6  | 26.6  | 49.2  | 68.4  | 79.0  | 79.4  |
| CO Yield (%)                                | 6.2   | 10.2  | 12.6  | 11.9  | 1.8   | 2.9   | 3.8   | 4.0   | 4.5   | 9.8   | 11.2  | 10.9  |
| CO <sub>2</sub> Yield (%)                   | 35.8  | 55.0  | 68.0  | 68.5  | 6.1   | 6.6   | 7.6   | 7.9   | 45.6  | 50.2  | 74.0  | 74.8  |
| CH <sub>4</sub> Yield (%)                   | 0.5   | 0.0   | 0.0   | 0.0   | 0.3   | 0.8   | 1.4   | 1.3   | 1.0   | 0.5   | 0.0   | 0.0   |
| CH <sub>3</sub> COCH <sub>3</sub> Yield (%) | 4.2   | 1.0   | 0.0   | 0.0   | 2.0   | 1.3   | 0.1   | 0.0   | 3.7   | 0.9   | 0.0   | 0.0   |
| C–C bond cleavage (%) <sup>a</sup>          | 42.5  | 65.2  | 80.6  | 80.4  | 8.2   | 10.3  | 12.8  | 13.2  | 51.1  | 60.5  | 85.2  | 85.7  |

$$^a \text{C–C bond cleavage conversion, } X_{\text{C–C bond}} (\%) = \frac{F_{\text{CH}_4, \text{out}} + F_{\text{CO}, \text{out}} + F_{\text{CO}_2, \text{out}}}{2 \times F_{\text{AcOH}, \text{in}}} \times 100$$

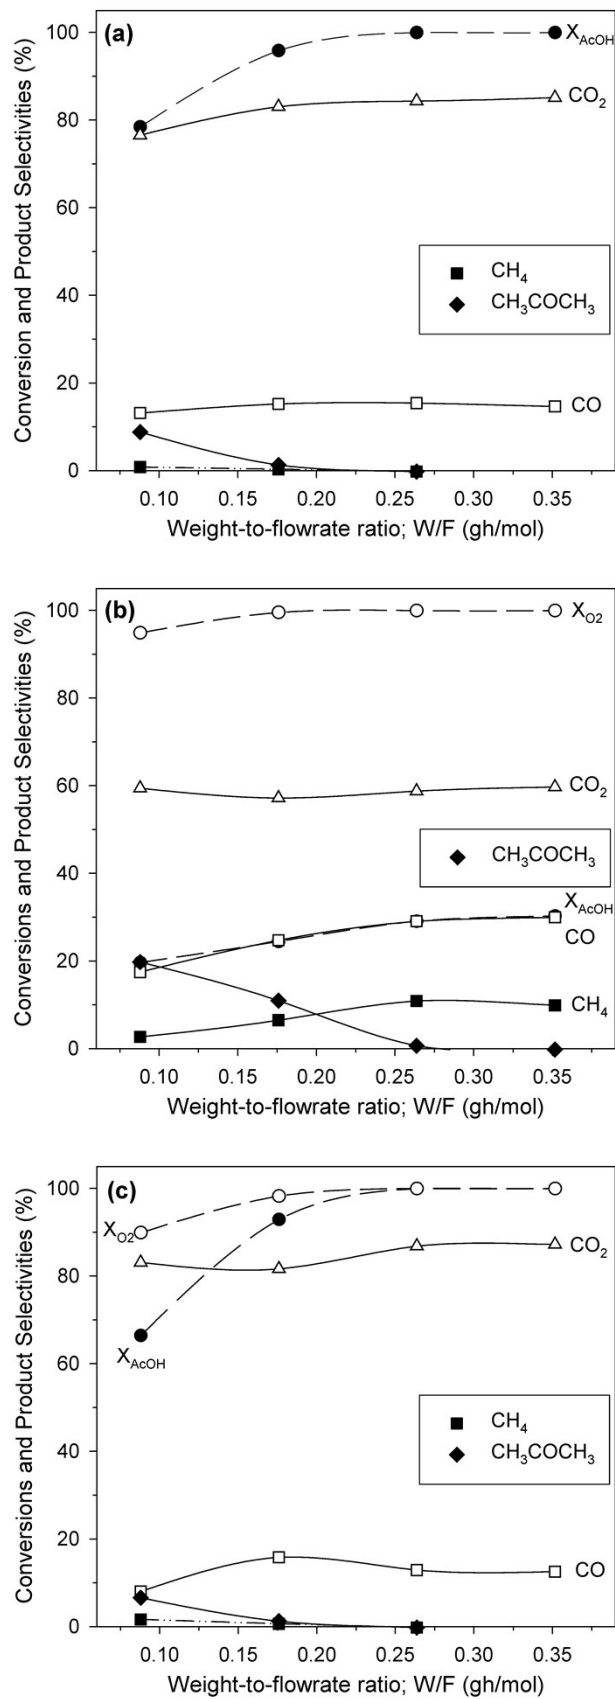

**Figure S4.** Conversions and selectivities from acetic acid reformings as a function of weight-to-flowrate ratio (W/F) over Ni/Ce<sub>0.75</sub>Zr<sub>0.25</sub>O<sub>2</sub> under (a) SR, (b) POX and (c) ATR conditions (T = 650 °C, S/C = 6, O/C = 0.175, F<sub>total</sub> = 170 ml/min and TOS = 3 hr).



### 2.3 Characterization of spent catalysts

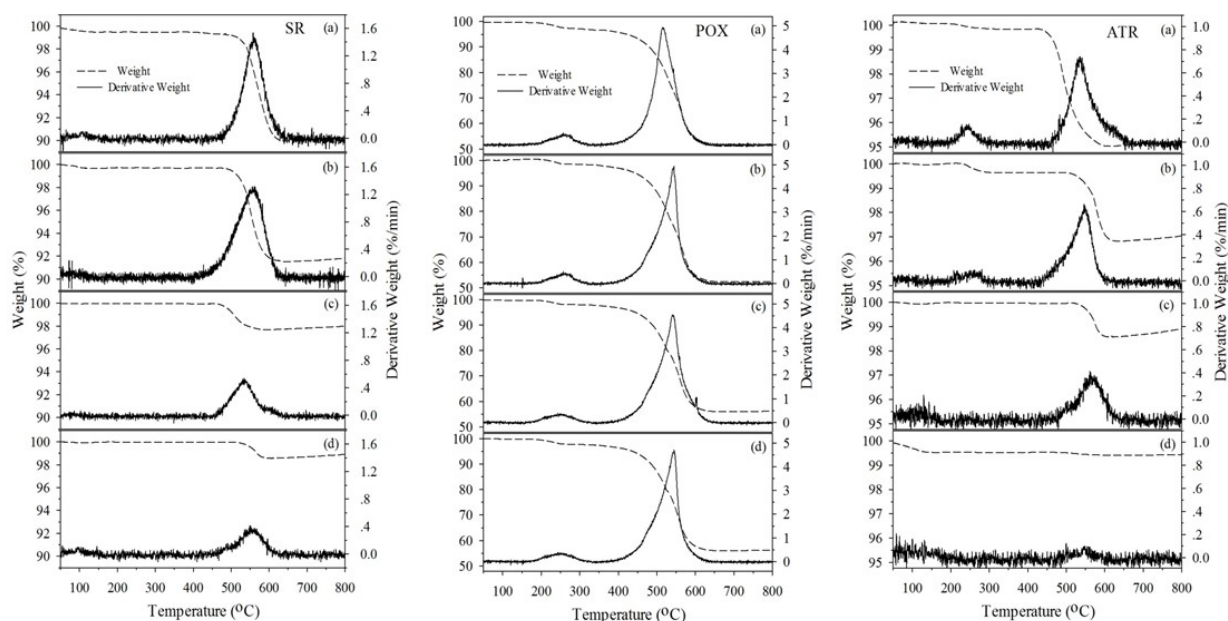

**Figure S5.** TG-DTA profiles of the spent  $\text{Ni/Ce}_{0.75}\text{Zr}_{0.25}\text{O}_2$  catalyst under different processes (SR, POX, and ATR) with a heating rate of  $10\text{ }^{\circ}\text{C}/\text{min}$ , an oxidizing gas containing  $\text{O}_2$  in  $\text{N}_2$  with a flow rate of  $20\text{ ml}/\text{min}$  at W/F of (a) 0.088, (b) 0.176, (c) 0.264, and (d) 0.352 g-hr/mol.

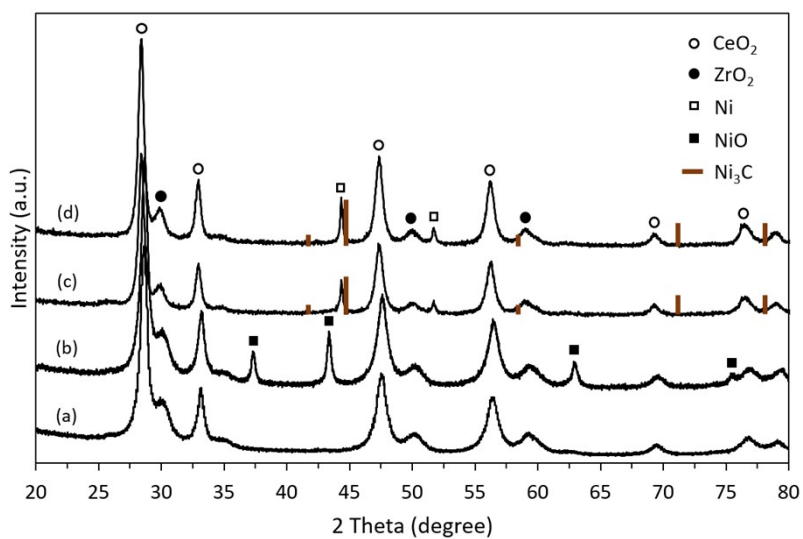

**Figure S6.** XRD patterns of the (a) fresh  $\text{Ce}_{0.75}\text{Zr}_{0.25}\text{O}_2$ , (b) fresh  $\text{Ni/Ce}_{0.75}\text{Zr}_{0.25}\text{O}_2$ , (c) spent  $\text{Ni/Ce}_{0.75}\text{Zr}_{0.25}\text{O}_2$  in zone 1 from ATR, and (d) spent  $\text{Ni/Ce}_{0.75}\text{Zr}_{0.25}\text{O}_2$  in zone 4 from ATR.  $\text{Ni}_3\text{C}$  was not detected as shown in the designated positions.

## References

- 1 P. G. M. Assaf, F. G. E. Nogueira and E. M. Assaf, *Catalysis Today*, 2013, **213**, 2–8.
- 2 M. Thammachart, V. Meeyoo, T. Rirksomboon and S. Osuwan, *Catalysis Today*, 2001, **68**, 53–61.
- 3 S. Pengpanich, V. Meeyoo and T. Rirksomboon, *Catalysis Today*, 2004, **93–95**, 95–105.
- 4 N. Phongprueksathat, V. Meeyoo and T. Rirksomboon, *International Journal of Hydrogen Energy*, 2019, **44**, 9359–9367.
